# Supplementary material for: Antioxidative Peptides from Proteolytic Hydrolysates of False Abalone (Volutharpa ampullacea perryi): Characterization, Identification, and Molecular Docking
Source: PubMed Central journal article supplement (PMC6409897; doi:10.3390/md17020116), 2019-02-13
Supplement: marinedrugs-17-00116-s001.pdf [file marinedrugs-17-00116-s001.pdf]

Supplement Table 1

The peptide sequences characterized in hydrolysate fraction of MW &lt; 3kDa.

| Peptide No. | Peptide sequence |
|-------------|------------------|
| 1           | NDNIQR           |
| 2           | IELLLL           |
| 3           | LLNTLK           |
| 4           | LADEIR           |
| 5           | LLKDQL           |
| 6           | <i>LEILNT</i>    |
| 7           | NWDLVG           |
| 8           | QDPLNR           |
| 9           | QVQNVR           |
| 10          | GTELFR           |
| 11          | LLVKLL           |
| 12          | ISAAELR          |
| 13          | FPSIVGR          |
| 14          | LTGMAFR          |
| 15          | FPGIADR          |
| 16          | FAPQLLT          |
| 17          | IIAPPER          |
| 18          | FPLLLFR          |
| 19          | KIDNYTK          |
| 20          | LEVNLMT          |
| 21          | LIILELL          |
| 22          | HLQLAIR          |
| 23          | IAKEGFA          |
| 24          | NLNPTTK          |
| 25          | VSHYSTK          |
| 26          | NLLNIPK          |
| 27          | SFRENNT          |
| 28          | GLLLHWS          |
| 29          | LQLISAG          |
| 30          | QCELNFK          |
| 31          | GIHETTY          |
| 32          | TEAPLNPK         |
| 33          | IIIIILII         |
| 34          | IILLLLIV         |
| 35          | SFTTTAER         |
| 36          | VFLENVIR         |
| 37          | TLEEEKLQ         |
| 38          | LIILELL          |
| 39          | DTETGVPT         |
| 40          | FLNNNALT         |
| 41          | LEV LGVPA        |
| 42          | KLDEKIVQ         |

---

|    |            |
|----|------------|
| 43 | LIMMLGWI   |
| 44 | TVPIYEGY   |
| 45 | VASFSTHK   |
| 46 | AVAGLGIL   |
| 47 | ESILQRIW   |
| 48 | VGDEAQSK   |
| 49 | SSSVVAAL   |
| 50 | FAGDDAPR   |
| 51 | LILLIRAK   |
| 52 | SVKNTAGL   |
| 53 | ADINAADQ   |
| 54 | KTWVKELQ   |
| 55 | KTKDDMHL   |
| 56 | DLTQLPYT   |
| 57 | EEQVAAIR   |
| 58 | VIPELNGK   |
| 59 | LARDKAAN   |
| 60 | LLIPSLLLL  |
| 61 | TLSDYNIQK  |
| 62 | GFAGDDAPR  |
| 63 | MGSTLIMLL  |
| 64 | VATVGPISV  |
| 65 | AGLQFPVGR  |
| 66 | LLIILLLV   |
| 67 | VLFPPLTLQ  |
| 68 | SSSVALHKK  |
| 69 | SDVYMTSL   |
| 70 | LGKTVPDDV  |
| 71 | GGKNLDELE  |
| 72 | SMSFFGLIM  |
| 73 | QVITIGNER  |
| 74 | LSDLSPFPG  |
| 75 | LLLLFAVGN  |
| 76 | LTESQIKIW  |
| 77 | LEDELLAEK  |
| 78 | VGYDALTDQ  |
| 79 | KPKESKDPF  |
| 80 | VTFQQAER   |
| 81 | IEAIDQVGS  |
| 82 | MKNPKASVL  |
| 83 | RSITRRVDE  |
| 84 | LIIIIAAMT  |
| 85 | ISGLIYEETR |
| 86 | DESGPSIVHR |
| 87 | YSQLENEFDR |

---

---

|     |             |
|-----|-------------|
| 88  | IQLLEEDLER  |
| 89  | LAITEVDLER  |
| 90  | AGFAGDDAPR  |
| 91  | DAVTYTEHAK  |
| 92  | LTEEQIAEFK  |
| 93  | LLIPSLLLL   |
| 94  | VLMLPSVTG   |
| 95  | ELAFQSDedr  |
| 96  | LGVVFSdvqW  |
| 97  | GWGQWIIQPK  |
| 98  | LSNLLSKRVS  |
| 99  | VVTSGNSLNG  |
| 100 | AVFPSIVGRP  |
| 101 | STTTGHLYK   |
| 102 | KDQVVYSVAA  |
| 103 | LIATVALGIY  |
| 104 | LLTEAPLNPK  |
| 105 | VAPEEHPVLL  |
| 106 | GYSFTTTAER  |
| 107 | DSGLLTPESV  |
| 108 | QTEKVVFCRD  |
| 109 | VEQEILETGI  |
| 110 | IASAPSVNVR  |
| 111 | VGSSFVGGFG  |
| 112 | DVNSLKSALA  |
| 113 | SDDLDLGQVG  |
| 114 | HQVMVGMGQK  |
| 115 | IWHHTFYNELR |
| 116 | ILLIIILII   |
| 117 | VEIANDQGNR  |
| 118 | IGGIGTVPVGR |
| 119 | EITALAPSTMK |
| 120 | DSYVGDEAQSK |
| 121 | PTKVGINGFGR |
| 122 | LSAAGLEAGNV |
| 123 | ATAASSSSLEK |
| 124 | VVYGGVAVNH  |
| 125 | AGLFVSSFFSV |
| 126 | LLLLIASAHSV |
| 127 | LFKDYLDSGL  |
| 128 | DAQPKTKYDVP |
| 129 | AVFPSIVGRPR |
| 130 | KAGSERNLIF  |
| 131 | LTLSGGQKQRI |
| 132 | ELDSLAVPLQQ |

---

---

|     |                 |
|-----|-----------------|
| 133 | DRASALIAQAI     |
| 134 | ALEDADTKNDP     |
| 135 | MIGINVFNLLG     |
| 136 | LQACIDLIEKP     |
| 137 | IGLFGGAGVGK     |
| 138 | LLEKLATEFGL     |
| 139 | TLSIQNDQASQR    |
| 140 | ELISNASDALDK    |
| 141 | EHALLAYTLGVK    |
| 142 | DSYVGDEAQSKR    |
| 143 | YYVTIIDAPGHR    |
| 144 | PWIAAQDSSTVE    |
| 145 | EVDEQMLNVQNK    |
| 146 | GEASLILITLGA    |
| 147 | KGENELCDIITQ    |
| 148 | LTASGPSIGARP    |
| 149 | MSIVLVAFEGAP    |
| 150 | LLVSPAATMPVD    |
| 151 | WSGLVETALNLL    |
| 152 | YISHIELAFSSV    |
| 153 | IAENELCDIITQ    |
| 154 | EGGGIVESIGEG    |
| 155 | CRPGALES GPAL   |
| 156 | FNLWGLSCSSLL    |
| 157 | GTIDLQMPKVLQ    |
| 158 | KDADGALLTMLI    |
| 159 | QEYDESGPSIVHR   |
| 160 | TVLIMELINNVAK   |
| 161 | AKCGAYQGQVLIF   |
| 162 | LLTLATCVGDGPA   |
| 163 | SAAGVVVLPKTED   |
| 164 | RSLGDFACQLEHL   |
| 165 | LGVYFTFLQGCEY   |
| 166 | QNVHLMAGMTQPK   |
| 167 | KPGGDMIIPDPKQ   |
| 168 | FKKAAAGIDDIP    |
| 169 | FTQAGSEVSALLGR  |
| 170 | TTGIVLDSGDGVTH  |
| 171 | LISWYDNEYGYSNR  |
| 172 | AHGGYSVFAGVGER  |
| 173 | NSSYFVEWIPNNVK  |
| 174 | RSVFLSKGMLMLLP  |
| 175 | GVVDS EDLPLNISR |
| 176 | AREYDRILSNRMNR  |
| 177 | ELPDGQVITIGNER  |

---

---

|     |                           |
|-----|---------------------------|
| 178 | SAYLVLTITIAAMT            |
| 179 | MQIHAHGHLVYGMG            |
| 180 | LLASMPLLVSLAWC            |
| 181 | WEDLANEIQEELNK            |
| 182 | ILKVLESKRTCCR             |
| 183 | ILVGAAVCFCLILA            |
| 184 | STAGDTHLGGEDFDNR          |
| 185 | MSATFIGNSTAIQELFK         |
| 186 | TEKGILSSIMGALGGIV         |
| 187 | EQEGGLGNFMNFMKENG         |
| 188 | DVCQPNLLHPLCQECEG         |
| 189 | VAPEEHPVLLTEAPLNPK        |
| 190 | IPSAVGYQPTLATDMGTMQER     |
| 191 | QTQTFTTYSDNQPGVLIQVYEGER  |
| 192 | LVQDVANNTNEEAGDGTTTATVLAR |
| 193 | AQTISYEVSMAVLLFPLFLGGSF   |

---
